# Supplementary material for: Effects of conformational flexibility of alkyl chains of cations on diffusion of ions in ionic liquids
Source: Royal Society of Chemistry journal article supplement (doi:10.1039/c0cp02087g), 2011-01-01
Supplement: c0cp02087g.pdf [file c0cp02087g.pdf]

# Supporting information

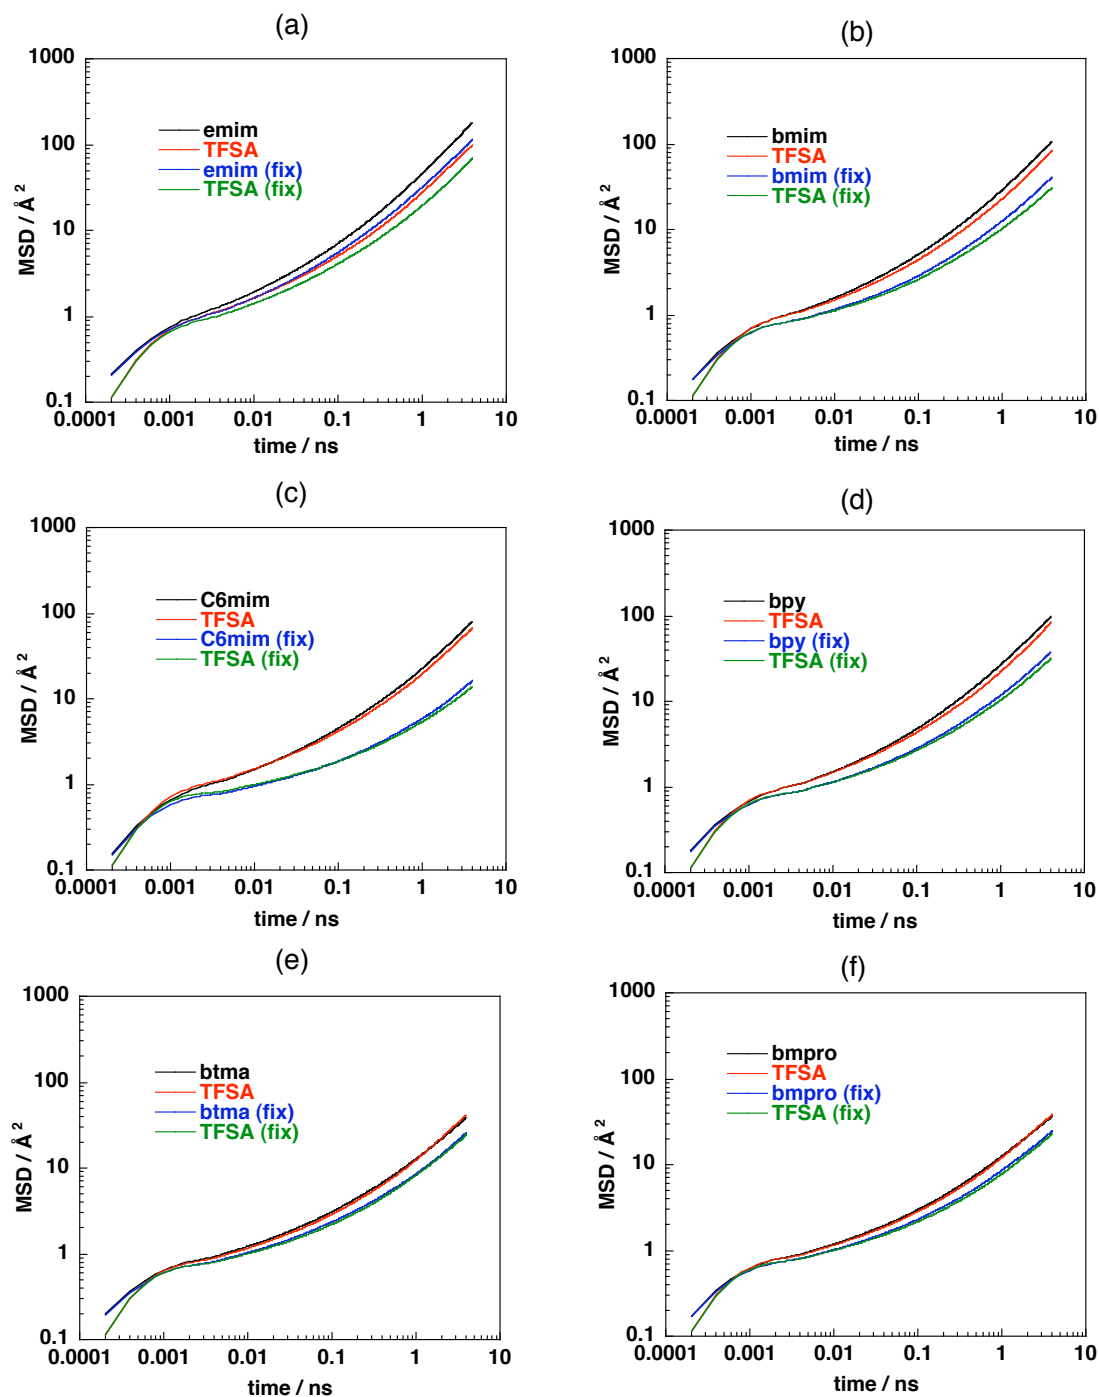

Figure 1S Mean-square displacements of the ions in ionic liquids obtained from molecular dynamic simulations with and without torsional constraint. (a) The [emim][TFSA] ionic liquid. The  $\text{C}_2\text{-N}_1\text{-C}_7\text{-C}_8$  bond was fixed when the torsional

constraint was imposed. (b) The [bmim][TFSA] ionic liquid. The  $C_2-N_1-C_7-C_8$ ,  $N_1-C_7-C_8-C_9$  and  $C_7-C_8-C_9-C_{10}$  bonds were fixed. (c) The [C<sub>6</sub>mim][TFSA] ionic liquid. The  $C_2-N_1-C_7-C_8$ ,  $N_1-C_7-C_8-C_9$ ,  $C_7-C_8-C_9-C_{10}$ ,  $C_8-C_9-C_{10}-C_{11}$ , and  $C_9-C_{10}-C_{11}-C_{12}$  bonds were fixed. (d) The [bpy][TFSA] ionic liquid. The  $C_2-N_1-C_7-C_8$ ,  $N_1-C_7-C_8-C_9$  and  $C_7-C_8-C_9-C_{10}$  bonds were fixed. (e) The [btma][TFSA] ionic liquid. The  $C_6-N_1-C_2-C_3$ ,  $N_1-C_2-C_3-C_4$  and  $C_2-C_3-C_4-C_5$  bonds were fixed. (f) The [bmpro][TFSA] ionic liquid. The  $C_2-N_1-C_7-C_8$ ,  $N_1-C_7-C_8-C_9$  and  $C_7-C_8-C_9-C_{10}$  bonds were fixed.
